# Supplementary material for: Promoting Sustainable Farmers’ E-Commerce Sales Participation in Tibet: A fsQCA Analysis of Behavioral Drivers
Source: Research Square preprint supplement (doi:10.21203/rs.3.rs-6201308/v1), 2025-03-31
Supplement: Supplementary file 1 [file 1336737db3dfde2d44b8d9ea.xlsx]

## Sheet: Sheet1
id	x1	x2	x3	x4	x5	x6	x7	x8	y	id
1	0.0001	0.0157648	0.762602	0.0002521	1	0.454942	0.332726	0.794752	0.0001	540127203201
2	0.501494	0.0471068	0.75	0.135438	1	0.22967	0.294073	0.0001	0.0001	540127203201
3	0.667662	0.0001	0.131349	0.0001	1	0.5247	0.156402	0.0001	0.0001	540127203201
4	0.335391	0.0471068	0.474848	0.0661186	1	0.306283	0.17949	0.0001	0.0001	540127203201
5	0.75	0.0471068	0.881301	0.0775585	1	0.113065	0.0577942	0.0001	0.0001	540127203201
6	0.75	0.0157648	0.525252	0.0680963	1	0.44052	0.331795	0.397386	0.0001	540127203201
7	1	0.0627779	1	0.0970256	1	0.651779	0.113503	0.0001	0.0001	540127203201
8	0.667662	0.0627779	0.131349	0.116338	1	0.0469185	0.0889353	0.0001	0.0001	540127203201
9	0.916169	0.0627779	0.737398	0.0001	1	0.306283	0.0223431	0.0001	0.0001	540127203201
10	1	0.0471068	0.487398	0.0025284	1	0.787361	0.125121	0.205348	0.0001	540524201202
11	0.75	0.0627779	0.75	7.76e-05	1	0.225682	0.339951	0.205348	0.0001	540524201202
12	0.916169	0.0001	0.0001	0.0101795	1	0.616146	0.227527	0.602634	0.0001	540524201202
13	0.75	0.0627779	0.618699	0.0129426	1	0.0613413	0.23505	0.205348	0.0001	540524201202
14	1	0.0627779	0.881301	0.0460872	1	0.12619	0.416327	0.397386	0.0001	540127203201
15	1	0.0471068	0.474848	0.0067011	1	0.622933	0.171074	0.0001	0.0001	540127203201
16	0.335391	0.0627779	1	0.0746202	1	0.12619	0.555822	0.397386	0.0001	540127203201
17	0.666169	0.0471068	0.25	0.0001	1	0.470695	0.226038	0.794752	1	540127203201
18	0.75	0.0157648	0.393951	0.0662791	1	0.723892	1	0.205348	0.0001	540202205201
19	1	0.0627779	0.381301	0.0278706	1	0.111767	0.0248604	0.205348	0.0001	540202205201
20	1	0.0627779	1	0.0481929	1	0.155035	0.334342	0.602634	1	540202205201
21	1	0.0627779	1	0.0364936	1	0.0973444	0.0232741	0.205348	0.0001	540202205201
22	1	0.0627779	1	0.0673207	1	0.12619	0.119305	1	0.0001	540202205201
23	1	0.0627779	1	0.0502462	1	0.0613413	0.112267	0.205348	0.0001	540202205201
24	0.5	0.0314358	0.5	0.0916939	0.0001	0.0469185	0.267928	0.205348	1	540627102205
25	0.75	0.0627779	0.631301	0.253228	0.0001	0.273872	0.307292	0.205348	0.0001	540627102205
26	1	0.0627779	1	0.162572	0.0001	0.0145069	0.0435691	0.205348	0.0001	540627102205
27	0.5	0.0627779	1	0.168159	0.0001	0.322474	0.0967308	0.205348	0.0001	540627102205
28	1	0.0627779	1	0.213577	0.0001	0.0433523	0.132197	0.602634	0.0001	540627102205
29	0.75	0.0314358	0.631301	0.0856633	0.0001	0.662531	0.691892	0.205348	1	540627102205
30	1	0.0627779	1	0.33301	0.0001	0.0145069	0.20646	0.205348	0.0001	540627102205
31	0.583831	0.0314358	0.631301	0.0001	0.333333	0.805363	0.0134059	0.205348	1	540627100002
32	0.75	0.0471068	0.487398	0.0290844	0.333333	0.211259	0.0443883	1	1	540627100002
33	0.75	0.0314358	0.881301	0.0775585	0.333333	0.805363	0.0577197	0.205348	1	540627100002
34	0.501494	0.0627779	0.525252	0.209214	1	0.0901867	0.378344	0.397386	0.0001	540127201203
35	0.335391	0.0627779	1	0.139411	1	0.111767	0.255084	0.0001	0.0001	540127201203
36	1	0.0627779	0.881301	0.0437003	1	0.458521	0.265138	0.794752	0.0001	540127201203
37	0.75	0.0471068	0.75	0.0969481	1	0.225682	0.139645	0.0001	0.0001	540127201203
38	0.501494	0.0627779	0.525252	0.0531275	1	0.244093	0.108736	0.794752	0.0001	540127201203
39	0.335391	0.0627779	0.762602	0.0001	1	0.590895	0.670294	0.0001	0.0001	540127201203
40	0.5	0.968658	0.5	0.0254508	0.666667	0.483788	0.094767	1	0.0001	540225206211
41	1	0.968658	1	0.0020941	0.666667	0.597774	0.103523	0.602634	0.0001	540225206211
42	0.75	0.984329	0.868699	0.0150304	0.666667	0.261685	0.234566	0.205348	0.0001	540225206211
43	0.583831	0.0314358	0.618699	0.0604297	0.666667	0.73238	0.0409624	0.0001	1	540225100210
44	1	1	1	0.0119708	0.666667	0.111767	0.714804	0.205348	0.0001	540225206211
45	1	1	1	0.0118021	0.666667	0.483788	0.22728	0.205348	0.0001	540225206211
46	1	1	1	0.0099558	0.666667	0.0973444	0.100658	0.205348	0.0001	540225206211
47	1	1	1	0.0101795	0.666667	0.44052	0.277839	0.205348	0.0001	540225206211
48	1	1	1	0.0230395	0.666667	0.12619	0.128915	0.602634	0.0001	540225206211
49	1	1	1	0.0163257	0.666667	0.567968	0.577024	1	0.0001	540225206211
50	1	1	1	0.0001861	0.666667	0.426097	0.11176	0.205348	0.0001	540225206211
51	1	1	1	0.0036681	0.666667	0.29053	0.297951	0.205348	0.0001	540225206211
52	0.833831	1	0.606097	0.0257413	0.666667	0.12619	0.227341	0.205348	0.0001	540225206211
53	1	1	1	0.0001439	0.666667	0.458521	0.37242	0.205348	0.0001	540225206211
54	1	1	1	0.0126591	0.666667	0.29053	0.267517	0.205348	0.0001	540225206211
55	0.75	0.0627779	0.23745	0.007778	1	0.0324958	0.0189917	0.205348	0.0001	540524202206
56	1	1	1	0.0095637	0.666667	0.0829217	0.150071	0.205348	0.0001	540225206211
57	1	1	0.606097	0.0175201	0.666667	0.111767	0.122305	0.205348	0.0001	540225206211
58	0.75	1	0.525252	0.0333668	0.666667	0.12619	0.138714	0.205348	0.0001	540225206211
59	0.5	0.0471068	0.75	0.0059142	1	0.127488	0.18832	0.205348	0.0001	540524202206
60	0.916169	1	1	0.031676	0.666667	0.6482	0.115705	0.205348	0.0001	540225206211
61	0.75	0.0471068	0.737398	0.007104	1	0.0469185	0.0772698	0.205348	0.0001	540524202206
62	1	1	1	0.0020991	0.666667	0.521121	0.558663	0.205348	0.0001	540225206211
63	0.75	0.0471068	0.75	0.0067565	1	0.66978	0.805645	1	1	540524202206
64	1	0.0627779	1	0.0155117	0.666667	0.0973444	0.297908	0.0001	0.0001	540225100210
65	1	0.0627779	1	0.0001241	0.666667	0.509923	0.236465	0.0001	1	540225100210
66	1	0.0627779	1	0.0007368	0.666667	0.0540921	0.187868	0.0001	0.0001	540225100210
67	0.583831	0.0471068	0.618699	0.166945	1	0.0469185	0.128622	1	0.0001	542526203205
68	0.417662	0.0001	0.618699	0.191189	1	0.261685	0.151196	0.205348	0.0001	542526203205
69	1	0.0627779	1	0.310953	1	0.447785	0.546114	0.205348	0.0001	542526203205
70	1	0.0314358	0.474848	0.124117	1	0.320706	0.0912344	0.205348	0.0001	542526203205
71	1	0.0627779	0.474848	0.213315	1	0.651779	0.25918	0.205348	0.0001	542526203205
72	1	0.0627779	1	0.3229	1	0.225682	0.0222314	0.205348	0.0001	542526203205
73	1	0.0627779	1	0.0077558	0.666667	0.733356	0.0001	0.0001	0.0001	540225100210
74	0.75	0.0314358	0.512602	0.0158917	0.666667	0.163491	0.117786	0.0001	1	540225100210
75	0.583831	0.0627779	1	1.16e-05	0.666667	0.426097	0.14523	0.794752	0.0001	540225100210
76	0.75	0.0471068	0.75	0.0019777	1	0.180302	0.205147	0.602634	1	540328202201
77	0.5	0.0314358	0.5	0.0003102	1	0.29053	0.546997	0.205348	1	540328202201
78	0.666169	0.0314358	0.5	0.0007368	1	0.417609	0.967308	1	1	540328202201
79	1	0.0001	0.606097	0.015535	1	0.79365	0.124002	0.205348	1	540328202201
80	0.75	0.0001	1	0.0003878	1	0.144191	0.251397	0.205348	0.0001	540328202201
81	0.335391	0.0627779	0.525252	0.00272	0.666667	0.469365	0.0726152	0.0001	0.0001	540225100210
82	0.667662	0.0627779	0.23745	0.0007756	0.666667	0.787361	0.0037239	0.0001	0.0001	540225100210
83	0.5	0.0627779	1	0.0127971	0.666667	0.535544	0.579581	0.794752	0.0001	540225100210
84	0.748506	0.0627779	1	0.0078722	0.666667	0.762186	0.139942	0.794752	0.0001	540225100210
85	0.75	0.0471068	0.75	0.137486	1	0.637356	0.171114	0.205348	0.0001	542526203205
86	1	0.0314358	0.5	0.0001	1	0.517173	0.187682	0.205348	0.0001	542526203205
87	1	0.0471068	1	0.0001	1	0.390094	0.178373	0.602634	0.0001	542526203205
88	0.75	0.0471068	0.868699	0.29849	1	0.447785	0.338721	1	0.0001	542526203205
89	0.75	0.0627779	1	0.40826	1	0.47663	0.274618	0.205348	0.0001	542526203205
90	1	0.0627779	1	0.36507	1	0.469365	0.39742	0.205348	0.0001	542526203205
91	1	0.0627779	1	0.224236	1	0.0613413	0.21182	0.205348	0.0001	542526203205
92	1	0.0471068	1	0.268913	1	0.418939	0.186052	0.205348	0.0001	542526203205
93	0.5	0.0471068	0.762602	0.0391112	1	0.26895	0.45573	0.205348	0.0001	540328202201
94	0.75	0.0627779	0.75	0.27895	1	0.0613413	0.252224	0.602634	1	542526203205
95	0.5	0.0471068	0.618699	0.0002792	1	0.119032	0.354734	0.205348	0.0001	540328202201
96	0.833831	0.0627779	0.5	2.33e-05	0.666667	0.787361	0.0085649	0.0001	0.0001	540225100210
97	0.75	0.0471068	0.618699	0.0305697	1	0.119032	0.268862	0.205348	1	540328202201
98	0.5	0.0314358	0.631301	0.0162485	1	0.228447	0.137648	0.205348	1	540328202201
99	0.5	0.0314358	0.5	0.0292306	1	0.337377	0.107992	0.205348	1	540328202201
100	0.583831	0.0471068	0.75	0.0008144	1	0.55948	0.4005	0.602634	1	540328202201
101	0.5	0.0157648	0.5	0.0001125	1	0.104609	0.122887	0.205348	1	540328202201
102	0.5	0.0471068	0.5	0.0295315	1	0.575603	0.110296	0.205348	1	540328202201
103	0.75	0.0471068	0.75	0.0281801	1	0.564389	0.152414	0.205348	0.0001	540328202201
104	0.25	0.0157648	0.25	0.0001	0.666667	0.436088	0.0596561	0.397386	1	540325101210
105	0.5	0.0314358	0.5	0.015535	1	0.26895	0.165432	0.205348	1	540328202201
106	0.75	0.0471068	0.618699	0.0277271	1	0.651779	0.0930963	0.205348	1	540328202201
107	0.5	0.0314358	0.5	0.0429286	1	0.283373	0.404127	0.602634	1	540328202201
108	0.5	0.0314358	0.5	0.0008919	1	0.348221	0.0798767	0.205348	1	540328202201
109	0.5	0.0471068	0.25	0.0005235	0.666667	0.418939	0.0050123	0.205348	0.0001	540124204202
110	0.5	0.0001	0.0001	0.0006371	0.666667	0.304953	0.394542	0.205348	1	540124204202
111	0.75	0.0314358	1	0.0001	1	0.0469185	0.313549	0.205348	0.0001	542526200201
112	1	0.0627779	1	0.0001	1	0.404517	0.19364	0.602634	0.0001	542526200201
113	0.75	0.0314358	0.5	0.0008915	0.666667	0.342286	0.336496	0.205348	1	540124204202
114	0.75	0.0314358	0.631301	0.193608	1	0.454942	0.116184	0.205348	0.0001	542526200201
115	1	0.0627779	1	0.0001	1	0.454942	0.173532	0.205348	0.0001	542526200201
116	0.5	0.0314358	0.5	0.0001745	0.666667	0.320706	0.233968	0.0001	1	540325102206
117	0.417662	0.0471068	0.881301	0.124093	1	0.0469185	0.122887	0.205348	0.0001	542526200201
118	1	0.0627779	1	0.197626	1	0.404517	0.0904896	0.205348	0.0001	542526200201
119	1	0.0627779	1	0.368403	1	0.390094	0.160126	0.602634	0.0001	542526200201
120	0.75	0.0627779	0.868699	0.0001	1	0.20809	0.233337	1	0.0001	542526200201
121	1	0.0314358	0.618699	3.88e-05	0.666667	0.225682	0.0381734	0.794752	0.0001	540325102206
122	0.583831	0.0471068	0.881301	0.0001	0.666667	0.619355	0.446862	0.205348	0.0001	540124204202
123	0.583831	0.0627779	0.737398	0.0001	1	0.0324958	0.159009	0.205348	0.0001	542526200201
124	0.833831	0.0627779	0.737398	0.0011634	0.666667	0.801768	0.035749	0.205348	0.0001	540124204202
125	1	0.0627779	1	0.0001	1	0.291861	0.0849039	0.205348	0.0001	542526200201
126	1	0.0627779	1	0.0001	1	0.539123	0.0752219	0.205348	0.0001	542526200201
127	0.0001	0.0627779	1	0.0001	1	0.29053	0.317272	0.602634	0.0001	542526200201
128	0.333831	0.0314358	0.5	0.0002715	0.666667	0.0469185	0.0080063	0.602634	1	540124204202
129	0.75	0.0001	0.487398	0.0002715	0.666667	0.437311	0.0549268	0.0001	0.0001	540325102206
130	1	0.0157648	0.25	0.0001	1	0.44052	0.0834143	0.205348	0.0001	542526200201
131	1	0.0627779	1	0.0001	1	0.41573	0.0964478	1	0.0001	542526200201
132	0.75	0.0314358	0.881301	0.0001	1	0.0469185	0.257318	0.602634	0.0001	542526200201
133	0.5	0.0157648	0.356149	0.0009695	0.666667	0.404517	0.0042824	0.205348	1	540124204202
134	0.0001	0.0001	0.0001	0.235841	1	0.0469185	0.169249	0.205348	0.0001	542526203205
135	0.5	0.968658	0.5	0.0162268	0.666667	0.553546	0.362475	1	1	540328210201
136	0.416169	0.0471068	0.75	3.88e-05	0.666667	0.075764	0.111738	0.205348	0.0001	540124204202
137	0.5	0.968658	0.5	0.0136604	0.666667	0.388763	0.110191	0.205348	1	540328210201
138	0.667662	0.937322	0.474848	0.0127285	0.666667	0.288691	0.178747	0.205348	0.0001	540328210201
139	0.5	0.968658	0.5	0.0130236	0.666667	0.0901867	0.0079396	1	1	540328210201
140	0.5	0.968658	0.5	1	0.666667	0.225682	0.106145	0.205348	1	540328210201
141	0.5	0.0471068	0.75	0.000446	0.666667	0.156333	0.0268117	0.794752	1	540124101205
142	0.5	0.952987	0.25	0.0023209	0.666667	0.539123	0.120272	0.205348	1	540328210201
143	0.75	0.0314358	0.75	7.76e-05	0.666667	0.651779	0.326582	0.0001	1	540124101205
144	0.417662	0.0627779	0.868699	0.0001	0.666667	0.0469185	0.187474	0.0001	0.0001	540124101205
145	0.75	0.0001	0.762602	0.0004654	0.666667	0.714379	0.469206	0.0001	0.0001	540124101205
146	0.75	0.0471068	0.631301	0.0033509	0.666667	0.211259	0.453443	0.0001	1	540124101205
147	0.25	0.0157648	0.25	0.0001	0.666667	0.499541	0.0074477	0.0001	0.0001	540124101205
148	0.916169	0.0471068	0.75	9.31e-05	0.666667	0.5247	0.457837	0.0001	1	540124101205
149	0.916169	0.0157648	0.525252	0.0001	0.666667	0.626528	0.402176	0.0001	0.0001	540124101205
150	0.25	0.968658	0.23745	9.69e-05	0.666667	0.927886	0.223431	1	1	540328210201
151	0.5	0.0471068	0.75	0.0001	0.666667	0.608526	0.168691	0.0001	0.0001	540124101205
152	0.583831	0.0314358	0.631301	0.130522	1	0.261685	0.174276	0.205348	1	542526203205
153	0.25	1	1	0.0055012	0.666667	0.381606	0.0736578	1	1	540328210201
154	0.5	0.0471068	0.618699	0.0001	0.666667	0.291861	0.35749	0.0001	1	540124101205
155	0.5	1	1	0.0048474	0.666667	0.0901867	0.0486037	0.205348	1	540328210201
156	0.5	1	1	0.0048594	0.666667	0.075764	0.0028115	0.205348	0.0001	540328210201
157	0.5	0.968658	0.5	0.0169376	0.666667	0.075764	0.269165	0.205348	1	540328210201
158	0.5	0.968658	0.5	0.0216357	0.666667	0.418939	0.115147	0.205348	1	540328210201
159	0.833831	0.984329	0.75	0.0001551	0.666667	0.791031	0.0597976	1	1	540328210201
160	1	1	1	0.0048086	0.666667	0.12619	0.0253509	0.205348	0.0001	540328210201
161	0.5	0.968658	0.5	0.0019556	0.666667	0.250961	0.130406	0.205348	1	540328210201
162	0.5	0.984329	0.75	0.0163745	0.666667	0.487367	0.182238	0.205348	1	540328210201
163	0.5	0.968658	0.5	0.0156179	0.666667	0.111767	0.185712	0.602634	1	540328210201
164	0.5	0.968658	0.5	0.0178346	0.666667	0.12619	0.0876251	0.205348	1	540328210201
165	0.75	0.0471068	0.487398	0.0003413	1	0.454942	0.322486	0.205348	1	540425102212
166	0.5	0.0471068	0.0001	0.0064129	1	0.517912	0.318762	0.205348	1	540425102212
167	0.75	0.0471068	0.75	0.0009637	1	0.342286	0.301632	0.205348	0.0001	540425102212
168	0.5	0.0314358	0.5	0.0126032	1	0.356709	0.104305	0.205348	1	540425102212
169	0.25	0.0471068	0.512602	0.0009695	1	0.469365	0.0528042	0.602634	1	540425102212
170	0.75	0.0471068	0.75	0.0016287	1	0.356709	0.131452	0.205348	0.0001	540425102212
171	0.75	0.0314358	0.5	0.0160577	1	0.549967	0.08118	0.205348	1	540425102212
172	0.5	0.0314358	0.75	0.0013185	1	0.483788	0.165712	0.205348	1	540425102212
173	0.75	0.0001	0.75	0.0003312	1	0.261685	0.250154	1	1	540425102212
174	0.75	0.0157648	0.25	0.0026734	1	0.44052	0.0915621	0.205348	1	540425102212
175	0.75	0.0627779	1	0.013413	1	0.798189	0.321205	0.205348	0.0001	540425102212
176	0.75	0.0471068	0.631301	0.0164998	1	0.619355	0.184629	1	1	540425100206
177	0.75	0.0471068	0.618699	0.0279226	1	0.404517	0.408581	0.602634	1	540425100206
178	0.583831	0.0471068	0.631301	0.467358	1	0.225682	0.197364	0.205348	1	542526203205
179	0.5	0.0627779	0.474848	0.05305	1	0.0901867	0.20175	0.205348	0.0001	540202205201
180	0.335391	0.0471068	0.618699	0.0769372	1	0.149068	0.0312804	0.0001	0.0001	540127203201
181	0.335391	0.0627779	1	0.0215225	1	0.816191	0.389143	0.794752	0.0001	540127203201
182	0.667662	0.0627779	1	0.221964	1	0.385555	0.210211	0.0001	0.0001	540127203201
183	1	0.0157648	1	0.0681196	1	0.0829217	0.0256946	0.0001	0.0001	540127203201
184	1	0.0627779	1	0.0849971	1	0.0613413	0.392308	0.397386	0.0001	540127203201
185	0.583831	0.0157648	0.643903	0.0256719	1	0.582391	0.171184	0.205348	0.0001	540202205201
186	0.335391	0.0471068	0.868699	0.100643	1	0.0613413	0.126983	0.0001	0.0001	540127201203
187	0.501494	0.0627779	1	0.116299	1	0.0829217	0.0603264	0.0001	0.0001	540127201203
188	1	0.0627779	1	0.0001	0.666667	0.590525	0.191034	0.794752	1	540225100210
189	1	0.0627779	1	0.0236553	0.666667	0.068499	0.120675	0.0001	0.0001	540225100210
190	1	0.0314358	1	0.0003839	0.666667	0.44052	0.268118	0.0001	0.0001	540225100210
191	1	0.0627779	0.868699	0.0001318	0.666667	0.0829217	0.194013	0.397386	0.0001	540225100210
192	0.75	0.0471068	0.381301	0.0001	0.666667	0.22967	0.125121	0.0001	0.0001	540225100210
193	0.583831	0.0627779	1	0.0002055	0.666667	0.177914	0.19737	0.397386	0.0001	540225100210
194	0.583831	0.0627779	1	0.0001	0.666667	0.068499	0.0230879	0.794752	0.0001	540225100210
195	0.5	0.0627779	1	3.1e-05	0.666667	0.601723	0.050272	0.0001	0.0001	540225100210
196	0.335391	0.0157648	1	0.0004266	1	0.075764	0.0057444	0.205348	0.0001	540524202206
197	1	0.0627779	1	0.0001	1	0.390094	0.0778285	0.205348	0.0001	542526200201
198	0.75	1	0.75	0.0001163	0.666667	0.0613413	0.149107	1	1	540328210201
199	0.75	0.968658	0.631301	0.0180358	0.666667	0.156333	0.144498	1	1	540328210201
200	0.75	0.984329	0.5	0.0058855	0.666667	0.297795	0.296046	0.205348	1	540328210201
201	0.25	0.0627779	0.368699	0.0022802	0.666667	0.44052	0.149151	0.205348	0.0001	540124204202
202	0.75	0.0627779	0.868699	0.0001	0.666667	0.0973444	0.308186	0.205348	0.0001	540124204202
203	0.25	0.0471068	0.631301	0.0007151	0.666667	0.209961	0.0196493	0.602634	0.0001	540124204202
204	0.666169	0.0627779	0.631301	0.0003626	0.666667	0.390094	0.0084904	0.205348	0.0001	540124204202
205	0.833831	0.0471068	0.868699	0.0009423	0.666667	0.44052	0.238308	0.205348	0.0001	540124204202
206	0.75	0.0627779	1	0.0003102	0.666667	0.0613413	0.0834739	0.205348	0.0001	540124204202
207	0.25	0.0471068	0.75	0.0002908	0.666667	0.622933	0.143048	0.205348	0.0001	540124204202
